# Supplementary material
Source: HighWire-hosted journal article supplement (https://svn.smart01.highwire.org/content/7/4/337)
Supplement: inline-supplementary-material-2 [file inline-supplementary-material-2.pdf]

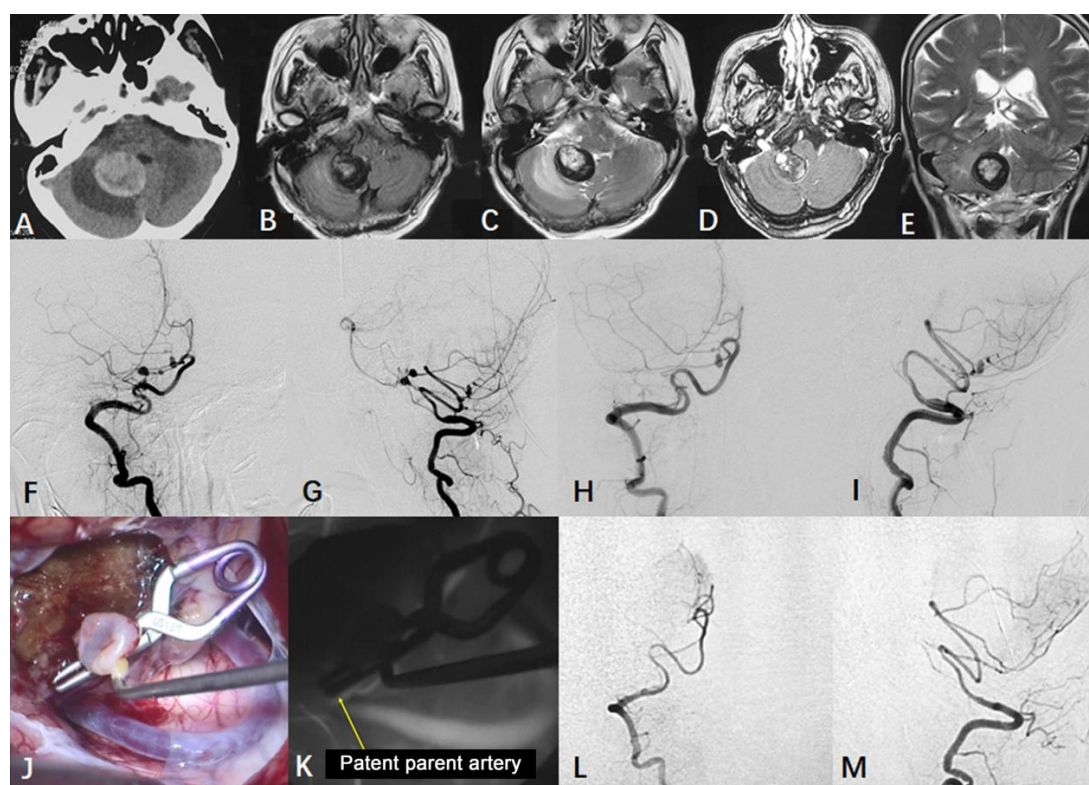

**Supplemental Fig. 1 Case 14: treatment of multiple PICA aneurysms with a hybrid operation.** A. An intracranial lesion was detected in an older male, and the patient had experienced dizziness for 6 months. CT revealed a right cerebellar lesion with hemorrhaging and SAH. B-E: MRI revealed a lesion with a low and mixed T1 signal, mixed T2 signal and uneven enhancement with edema (MRI T1 signal, T2 signal, and T1 enhancement signal: axial view, T2 signal: coronal view). F-G: DSA revealed multiple right PICA aneurysms, with 3 P2 and 2 P5 bead-like fusiform aneurysms (right VA injection, anterior and lateral views). H-I: In the hybrid operation room, the proximal 3 P2 aneurysms were coiled, and post-embolization DSA revealed aneurysm obliteration with parent artery patency (right VA injection, anterior and lateral views). J-K: Using the suboccipital midline approach, the distal 2 P5 aneurysms were clipped. L-M: Aneurysm obliteration and parent artery patency were confirmed by intraoperative ICG and DSA (right VA injection, anterior and lateral views; yellow arrow presents the patent parent artery).
